# Supplementary material for: Microarray Comparison of Anterior and Posterior Drosophila Wing Imaginal Disc Cells Identifies Novel Wing Genes
Source: PubMed Central journal article supplement (PMC3737175; doi:10.1534/g3.113.006569), 2013-08-01
Supplement: supp_g3.113.006569_FigureS2.pdf [file supp_g3.113.006569_FigureS2.pdf]

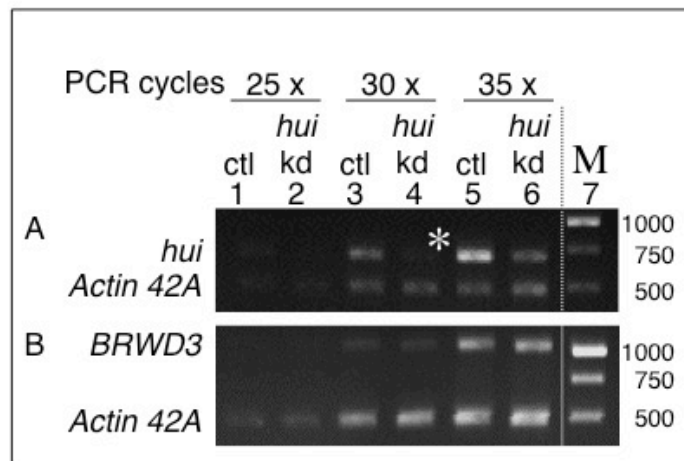

**Figure S2** RT-PCR quantification of *hui* expression levels after RNAi knockdown. (A, B) RNA was isolated with RNA purification Mini kit (Zymo Inc.) from wing discs of control larvae (ctl, *white*<sup>1118</sup>) and larvae that expressed the transgenic *hui* RNAi construct under control of the *C765-Gal4* (*hui* kd). Duplex RT-PCR for *hui* and *Actin 42A* (as reference) or *BRWD3/CG31132* and *Actin 42A* was performed with the OneStep RT-PCR kit (Qiagen). Primers were: GTCGTTTTGGAACCTTTTCACGCGTTC (*hui*-forward), GTTCTATTTGGATGAGTAAGTGGATTCGG (*hui*-reverse), CTGGGTCTGCCGATCACCATGTG (*BRWD3*-forward), CATTACATTAACCGACTGCCGATTGGC (*BRWD3*-reverse) GATGGCAACATACATGGCCG (*Actin 42A*-forward), GTGTGCAGCGGATAACTAG (*Actin 42A*-reverse). The annealing temperature was 50° C and 10 µl aliquots were removed after 25, 30, and 35 PCR cycles. (upper) Note that *hui* transcript levels (\*) are reduced in the RNAi discs relative to *Actin 42A* levels. (lower) Quantification of the predicted off-target transcript *BRWD3* in control discs, showing no reduction after *hui* knock-down. M - marker. Numbers indicate size (base pairs).
