# Supplementary material for: Microarray Comparison of Anterior and Posterior Drosophila Wing Imaginal Disc Cells Identifies Novel Wing Genes
Source: PubMed Central journal article supplement (PMC3737175; doi:10.1534/g3.113.006569), 2013-08-01
Supplement: supp_g3.113.006569_FigureS3.pdf [file supp_g3.113.006569_FigureS3.pdf]

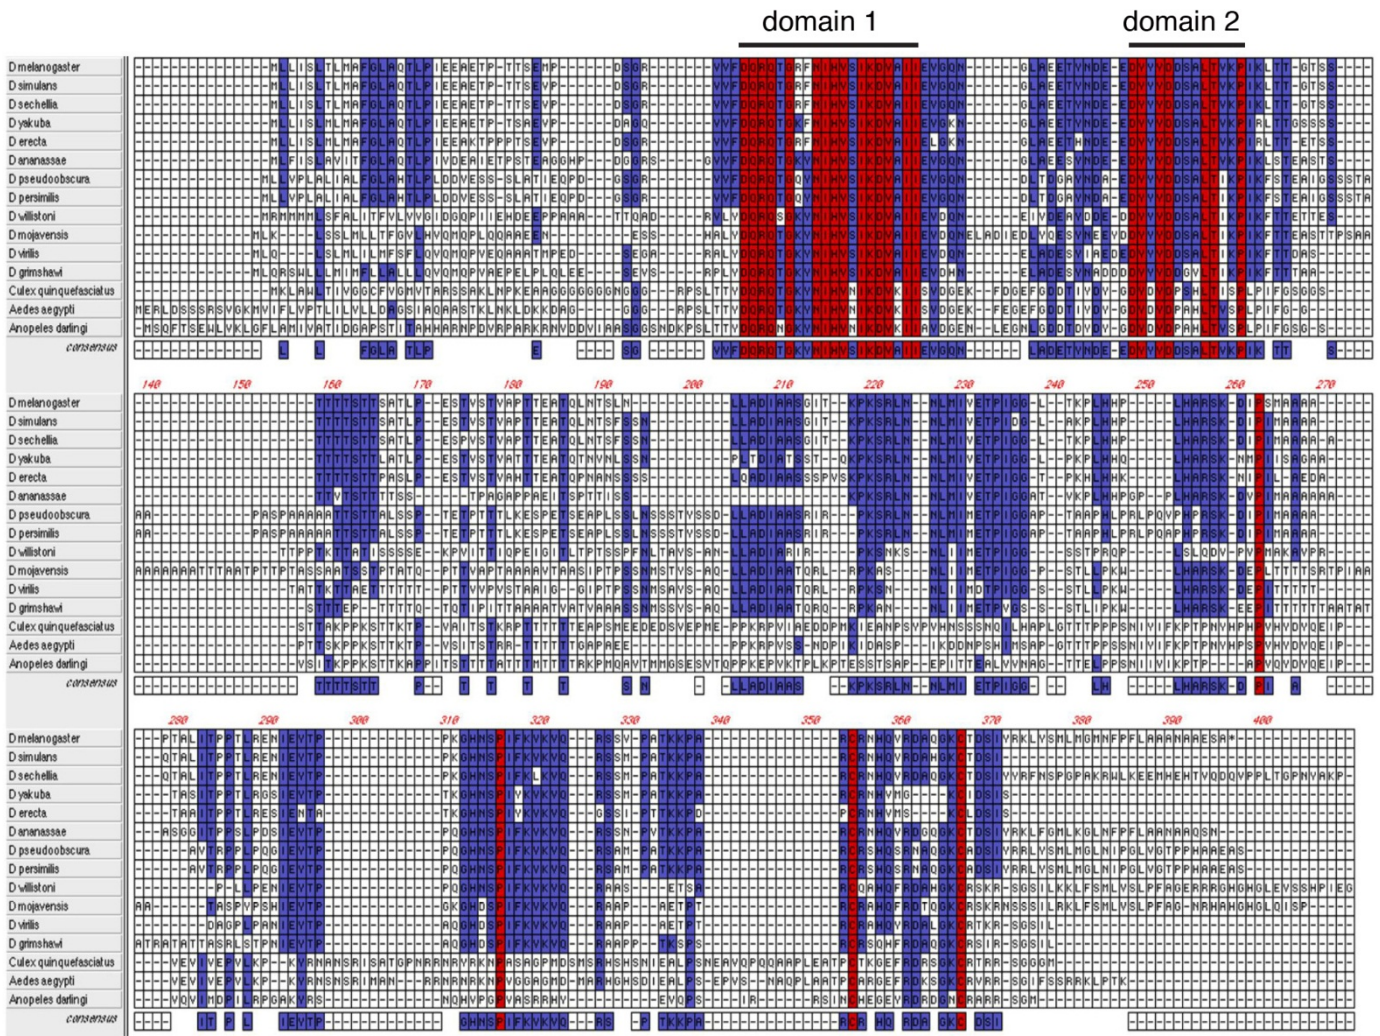

**Figure S3** Hui protein alignment. The putative Hui protein of *D. melanogaster* was aligned with homologs from eleven other *Drosophila* and three other insect species. Domains of highest conservations indicated; blue indicates strong conservation; red, complete identity. The positions of the arbitrarily determined Domains 1 and 2 are indicated.
