# Supplementary material for: Microarray Comparison of Anterior and Posterior Drosophila Wing Imaginal Disc Cells Identifies Novel Wing Genes
Source: PubMed Central journal article supplement (PMC3737175; doi:10.1534/g3.113.006569), 2013-08-01
Supplement: supp_g3.113.006569_TableS2.pdf [file supp_g3.113.006569_TableS2.pdf]

**Table S2 Protein sequences and prediction of signal peptides.** The predictions for signal peptides were generated with the SignalP 4.1 software (<http://www.cbs.dtu.dk/services/SignalP/>) from the Center for Biological Sequence Analysis of the Technical University of Denmark Lyngby.

SignalP 4.0: discriminating signal peptides from transmembrane regions  
 Petersen TN., Brunak S., von Heijne G. & Nielsen H.  
 Nature Methods, 8:785-786, 2011

**CG10200 (*hui*) predicted Protein 1**

MKYAVIAIALFAITTAASSAGQFLPRAFFTLTLDSEGHQSNVHPVNAHLLR  
 RLRRQSSSSSSSSSSSSSSSGGNVFTYASHSVQNADGSGHSGSSYTQQAAA  
 PVLGGVSFDERFGESSLTGGDNYYPTYNGYTSAAISSNSGVGSTGYSYQH  
 ISGVGPIPATQIQQTAVVVDASGNQKVTNIQGATDSNGVLNIKKTESTYS  
 SK

# SignalP-4.1 euk predictions  
 >Sequence

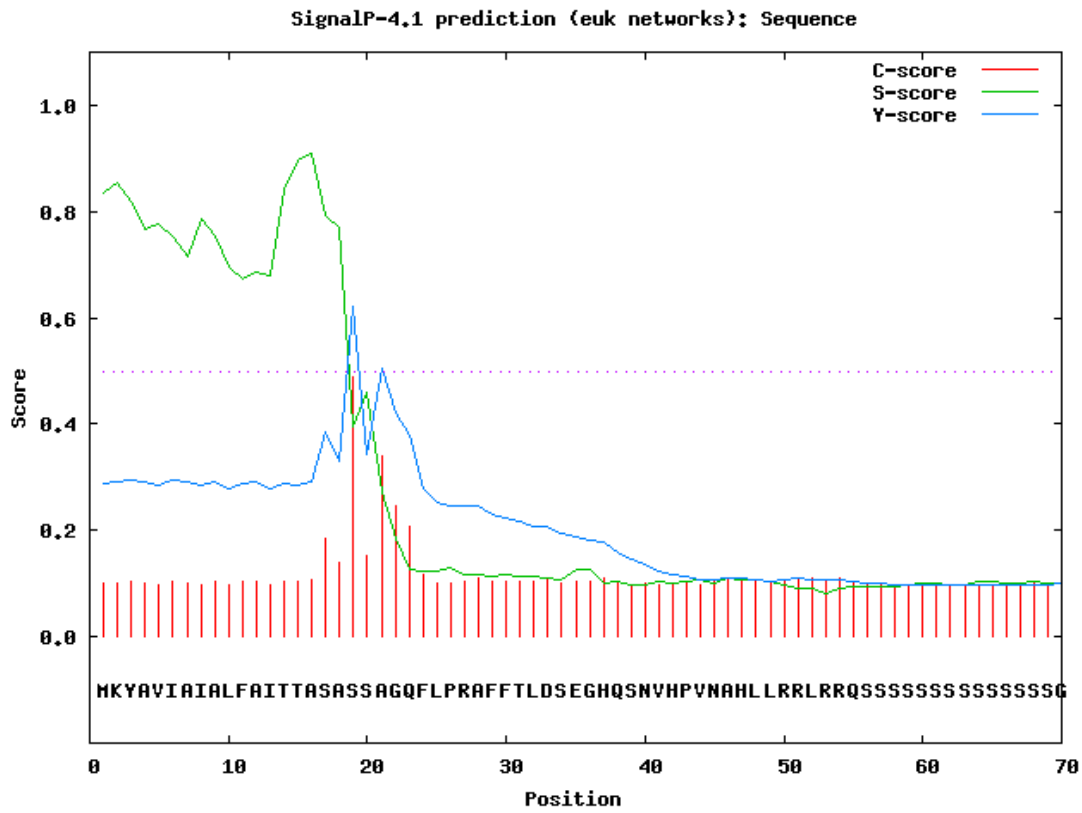

| # Measure | Position | Value | Cutoff | signal peptide? |
|-----------|----------|-------|--------|-----------------|
| max. C    | 19       | 0.490 |        |                 |
| max. Y    | 19       | 0.621 |        |                 |

```
max. S    16      0.910
mean S    1-18    0.778
D         1-18    0.706   0.340   YES
```

Name=Sequence SP='YES' Cleavage site between pos. 18 and 19: ASA-SS D=0.706  
D-cutoff=0.340 Networks=SignalP-noTM

# [data](#)

# [gnuplot script](#)

---

Signal peptides: 1

# [processed fasta entries](#)

# [gff file of processed entries](#)

## **CG10200 (*hui*) predicted Protein 2**

```
MKYAVIAIALFAITTASASSAGQFLPRAFFFTLDSEGHQSNVHPVNAHLLR
RLRRQSSSSSSSSSSSSSSGGNVFTYASHSVQNADGSGHSGSSYTQQAAA
PVLGGVSFDERFGESLTTGGDNYYPTYNGYTSAAISSNSGVGSGTGSYQH
ISGVGPIPATQIQQTVAVVDASGNQKVTNIQGATDSNGVLNIKKTESTYS
SK
```

# SignalP-4.1 euk predictions

**>Sequence**



## CG16884 predicted Protein

MKVFICLAALLVASACASKTEGEKVPLEKKLDKRGLLDLGYGYGHAGLDT  
 GYLGHGSI SGHGSYGHGYGLTGYSAPA AVAVGHSGPAI AVGHTAPAVAVH  
 HAPAPYVISKQADVHK TITITKGI PVPVHVDRPY PVPVHEKRV PVEVKVPV  
 PQPYEVIRKVPVTVKEYVKVPVVPVQPYEVIRHEKVPVHV PVD RPVPVEV  
 PRPYVPVAKPYPVYVEKAVNVQVPVHVDRPYPVYVKVPV VSHSVVKHAP  
 TVAVSSYPVSAIGHDATVYSDHHGYHK

# SignalP-4.1 euk predictions

>Sequence

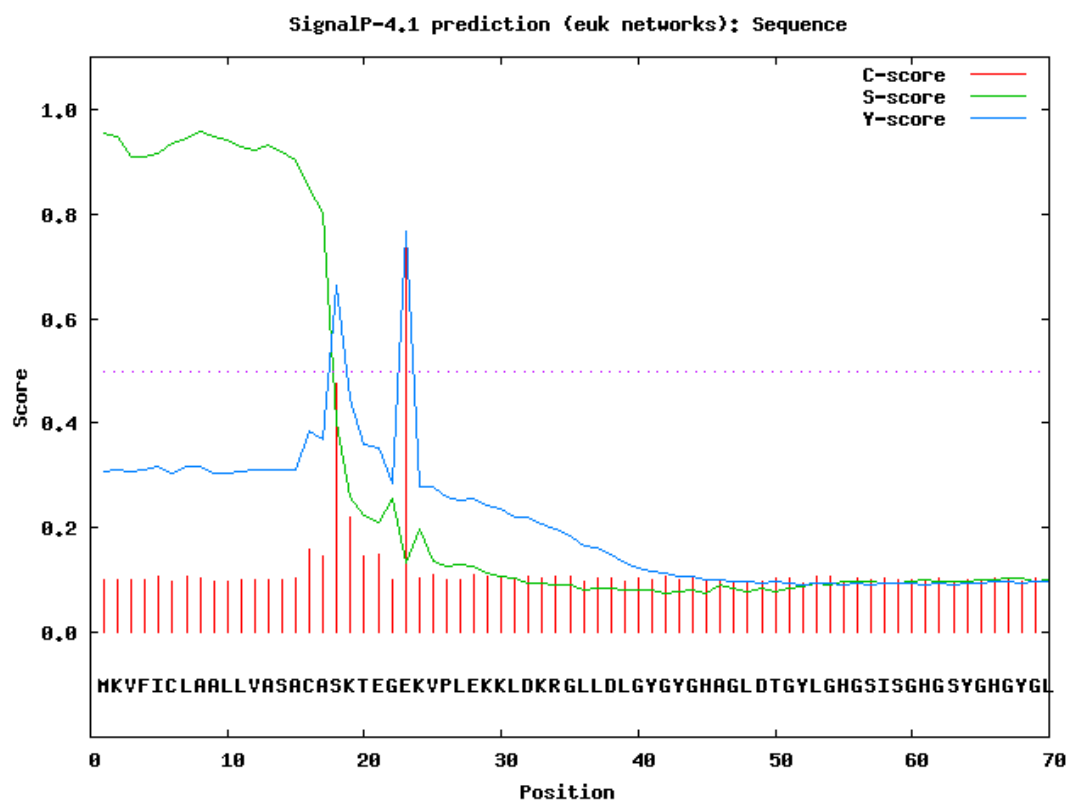

| # Measure | Position | Value | Cutoff | signal peptide? |
|-----------|----------|-------|--------|-----------------|
| max. C    | 23       | 0.762 |        |                 |
| max. Y    | 23       | 0.767 |        |                 |
| max. S    | 8        | 0.958 |        |                 |
| mean S    | 1-22     | 0.772 |        |                 |

D 1-22 0.770 0.340 YES

Name=Sequence SP='YES' Cleavage site between pos. 22 and 23: TEG-EK D=0.770  
D-cutoff=0.340 Networks=SignalP-noTM

# [data](#)

# [gnuplot script](#)

---

Signal peptides: 1

# [processed fasta entries](#)

# [gff file of processed entries](#)

## CG15905 predicted Protein

```
MLLISLTLMAFGLAQTLPiEEAETPTTSEMPDSEGRVVFDRQTGRFNIHV  
SIKDVAIIEVGQNGLAEEETYNDDEEDYYYDDSAITVKPIKLTGTSTTTT  
STTSATLPESTVSTVAPTTEATQLNTSLNLLADIAASGITKPKSRLNNLM  
IVETPIGGLTKPLHHPLHARSKDIPSMAAAAPTALITPPTLRENIEYTPP  
KGHNSPIFKVKVQRSSVPATKKPARCRNHQVRDAQGKCTDSIYRKLYSML  
MGMNFPFLAANAESA
```

# SignalP-4.1 euk predictions

>Sequence

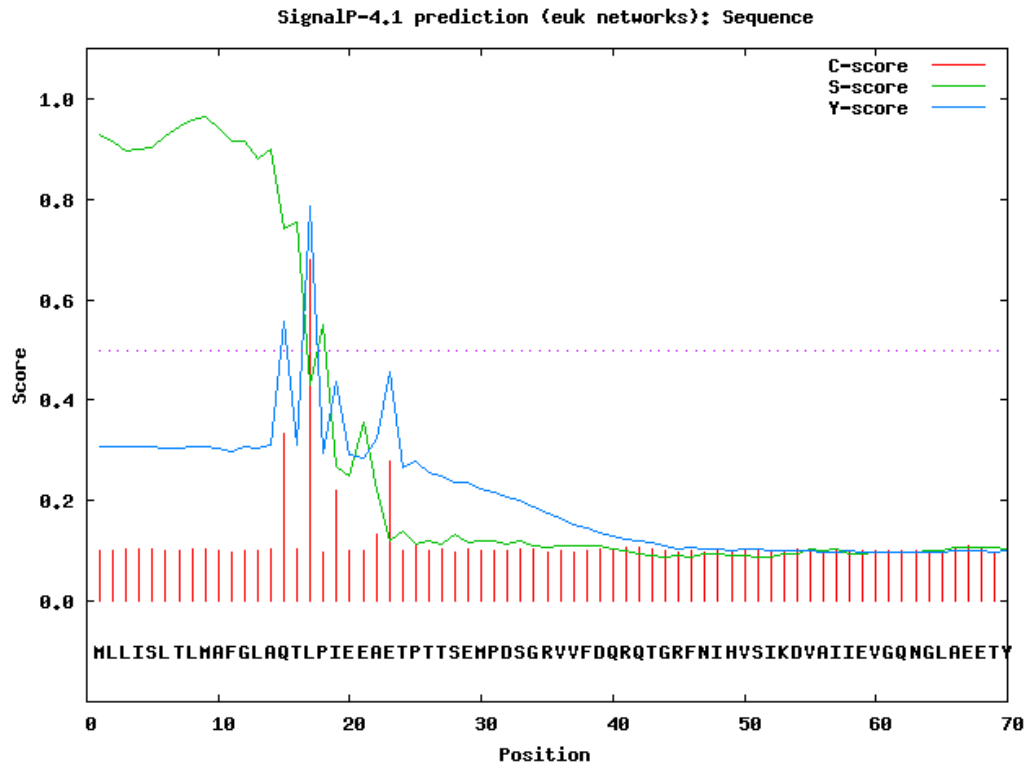

| # Measure | Position | Value | Cutoff | signal peptide? |
|-----------|----------|-------|--------|-----------------|
| max. C    | 17       | 0.680 |        |                 |
| max. Y    | 17       | 0.785 |        |                 |
| max. S    | 9        | 0.963 |        |                 |
| mean S    | 1-16     | 0.899 |        |                 |
| D         | 1-16     | 0.846 | 0.340  | YES             |

Name=Sequence SP='YES' Cleavage site between pos. 16 and 17: AQT-LP D=0.846  
D-cutoff=0.340 Networks=SignalP-noTM

# [data](#)

# [gnuplot script](#)

---

Signal peptides: 1

# [processed fasta entries](#)

# [gff file of processed entries](#)
